# Supplementary material
Source: Royal Society of Chemistry journal article supplement (doi:10.1039/d6su00071a)
Supplement: d6su00071a1.pdf [file d6su00071a1.pdf]

## Supplementary Materials

Table S1. Elemental composition of Biochar Now and Pacific Biochar.

| <b>Element</b> | <b>Biochar Now<br/>(mg/kg)</b> | <b>Pacific biochar<br/>(mg/kg)</b> |
|----------------|--------------------------------|------------------------------------|
| <b>Total C</b> | 66% ± 11.3                     | 73% -                              |
| <b>Total N</b> | 0.56% ± 0.04                   | 0.31% -                            |
| <b>Al</b>      | 609.4 ± 60.8                   | 4116.2 ± 138.1                     |
| <b>Ca</b>      | 4386.1 ± 419.9                 | 14717.7 ± 648.7                    |
| <b>Fe</b>      | 1626.5 ± 136.0                 | 3967.5 ± 93.3                      |
| <b>K</b>       | 1612.9 ± 118.9                 | 6144.3 ± 124.9                     |
| <b>Mg</b>      | 762.0 ± 70.7                   | 2766.6 ± 114.8                     |
| <b>Mn</b>      | 107.0 ± 9.2                    | 548.8 ± 27.5                       |
| <b>Na</b>      | 227.6 ± 54.3                   | 2268.8 ± 23.66                     |
| <b>P</b>       | 196.8 ± 80.6                   | 1103.4 ± 37.3                      |
| <b>Zn</b>      | 26.9 ± 1.0                     | 54.7 ± 3.5                         |

Table S2. Physicochemical properties of Biochar Now and Pacific Biochar.

| <b>Property</b>  | <b>Biochar Now</b> | <b>Pacific Biochar</b> | <b>Unit</b>                    |
|------------------|--------------------|------------------------|--------------------------------|
| Bulk density     | 140                | 91                     | kg/m <sup>3</sup> (dry)        |
| EC               | 0.014              | 0.022                  | S/m                            |
| Liming potential | 1.5                | 5.7                    | % CaCO <sub>3</sub> equivalent |
| Carbon content   | 87.4               | 90.4                   | % by weight                    |
| Ash content      | 2.1                | 4-8                    | % by weight                    |
| pH               | 8.93               | 8.13                   |                                |
| H:C              | 0.48               | 0.4                    |                                |

Table S3. Ozone concentration in DI water.<sup>1</sup>

| <b>Ozonation time (min)</b> | <b>O<sub>3</sub> in DI water (mg/L)</b> | <b>SD</b> |
|-----------------------------|-----------------------------------------|-----------|
| 5                           | 5.54                                    | 0.78      |
| 10                          | 11.03                                   | 1.42      |
| 20                          | 12.57                                   | 1.65      |

<sup>1</sup> The concentration of ozone in the solution was measured using the DPD method (N,N-diethyl-p-phenylenediamine) from CHEMetrics (Ozone vacu-vials). The experiments were carried out in duplicates.

Table S4. Volume of HCl used to acidify LAD (mL HCl per L of LAD).

| pH  | Volume of 5 M HCl (mL/L) | Equivalent volume of concentrated HCl (mL/L) | SD   |
|-----|--------------------------|----------------------------------------------|------|
| 6.5 | 41.67                    | 17.36                                        | 0.34 |
|     | 40.00                    | 16.67                                        |      |
| 5.0 | 66.67                    | 27.78                                        | 0.35 |
|     | 65.00                    | 27.08                                        |      |

Table S5. Dissolved reactive P (DRP) concentrations on LAD before and after ozonation.

| Sample                     | Filtered DRP (mg/L) | SD   |
|----------------------------|---------------------|------|
| Untreated LAD              | 28.94               | 1.49 |
| LAD after 5 min ozonation  | 35.06               | 0.66 |
| LAD after 10 min ozonation | 47.97               | 1.65 |

### **Biochar dosing**

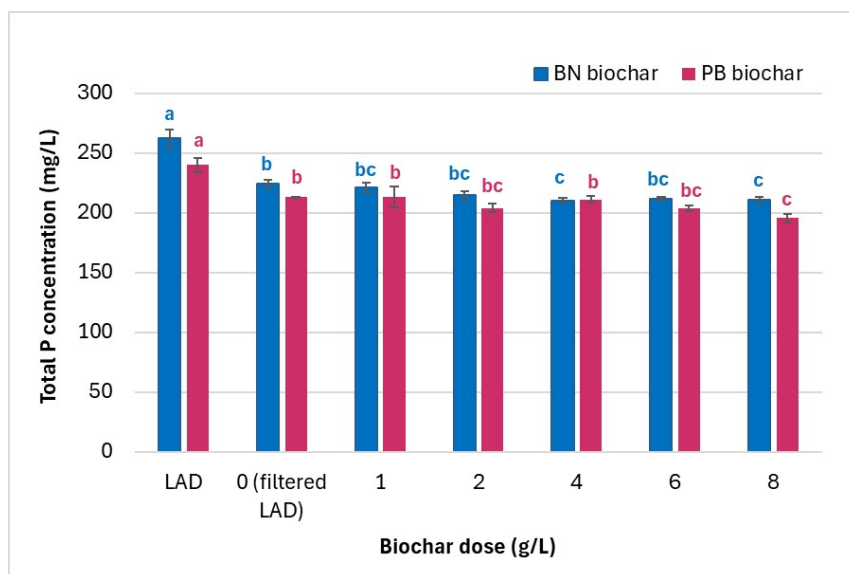

Figure S1. Total P concentration in the filtered LAD after treated with increasing doses of BN biochar or PB biochar. Different letters indicate significant differences between biochar doses within each biochar type ( $p < 0.05$ ).

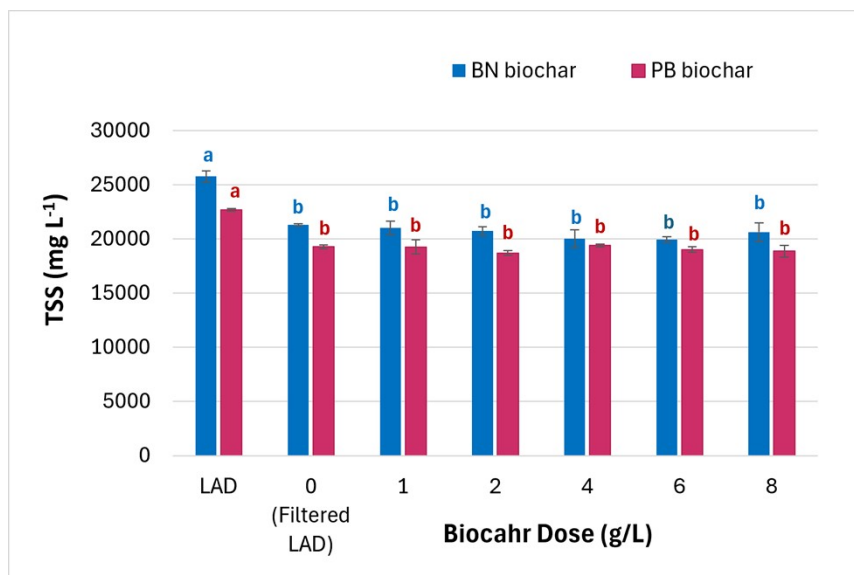

Figure S2. TSS concentration in the filtered LAD after treated with increasing doses of BN biochar or PB biochar. Different letters indicate significant differences among biochar doses within each biochar type ( $p < 0.05$ ).

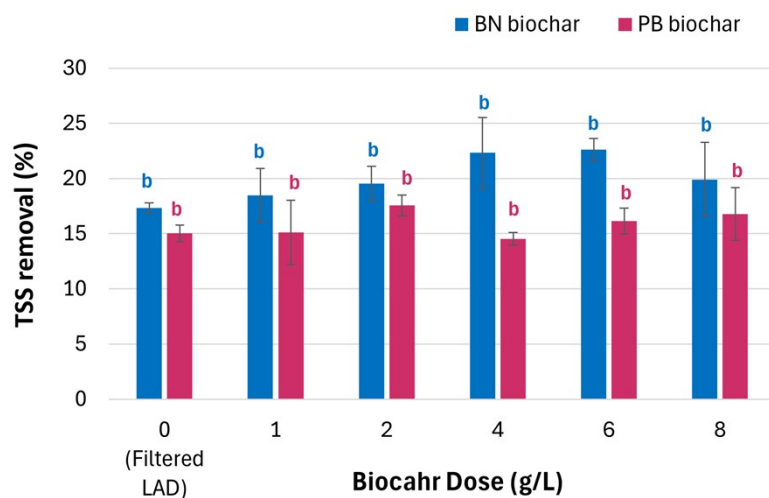

Figure S3. TSS removals from LAD after treated with increasing doses of BN biochar or PB biochar. Different letters indicate significant differences among biochar doses within each biochar type ( $p < 0.05$ ).

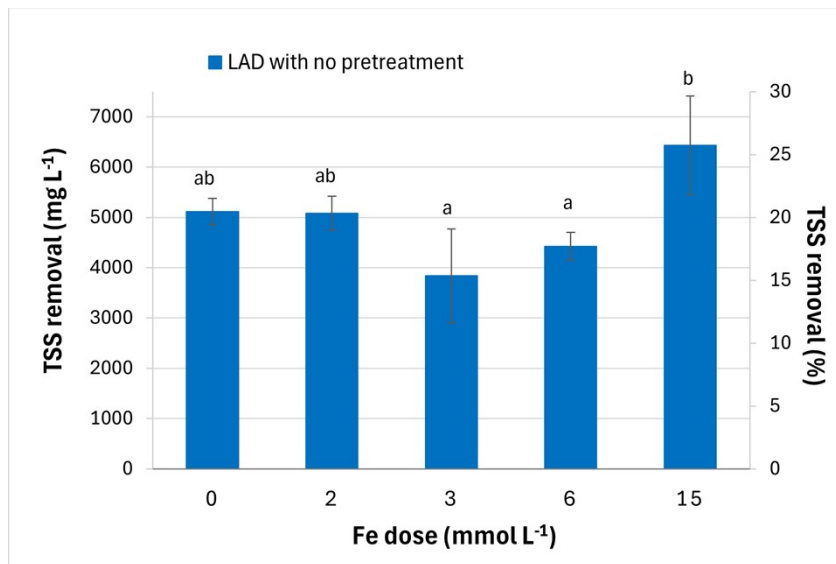

Figure S4. TSS removal for the 6 g L<sup>-1</sup> biochar treatment at different Fe doses. The initial total P concentration of LAD was 262 mg L<sup>-1</sup>. Different letters indicate significant differences on P recovery between Fe doses ( $p < 0.05$ ).

### Effect of pretreatment

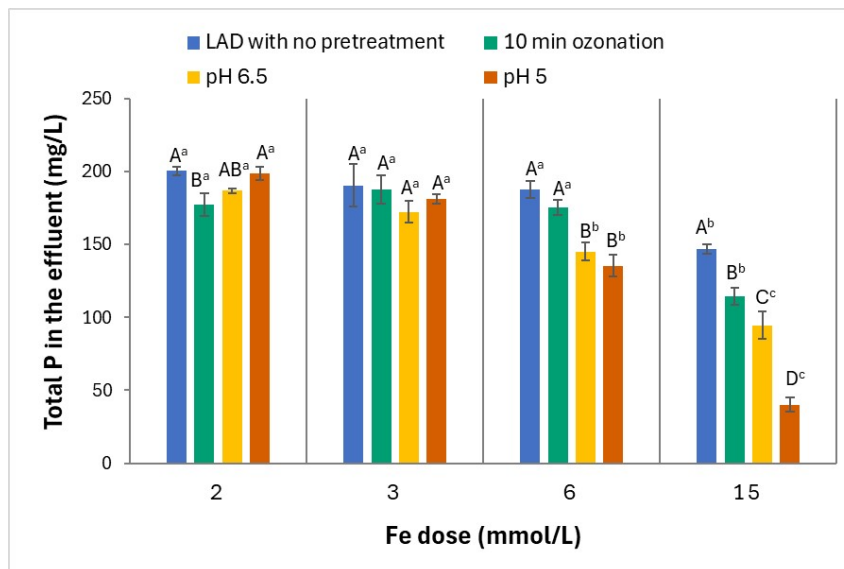

Figure S5. Total P concentration in the LAD using either no pretreatment, 10 min of ozonation, acidification to pH 6.5, and acidification to pH 5.0. Pretreatments were applied before the addition of Fe and biochar. Different uppercase letters indicate significant differences between treatments within the same Fe dose ( $p < 0.05$ ). Different superscript letters indicate significant differences between Fe doses within the same treatment ( $p < 0.05$ ).

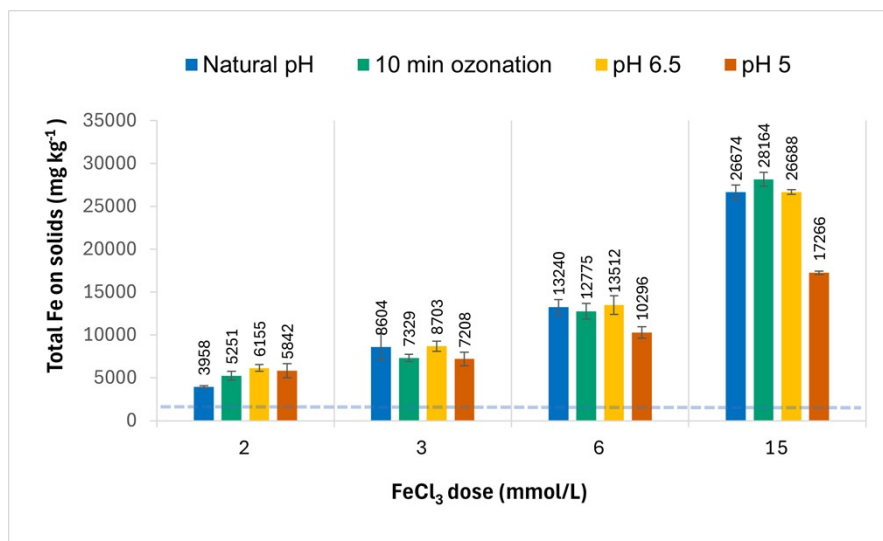

Figure S6. Total Fe concentration in the LAD using either no pretreatment, 10 min of ozonation, acidification to pH 6.5, and acidification to pH 5.0. Pretreatments were applied before the addition of Fe and biochar. Dashed line indicates the Fe concentration on LAD when 6 g L<sup>-1</sup> of biochar was used with no Fe addition.

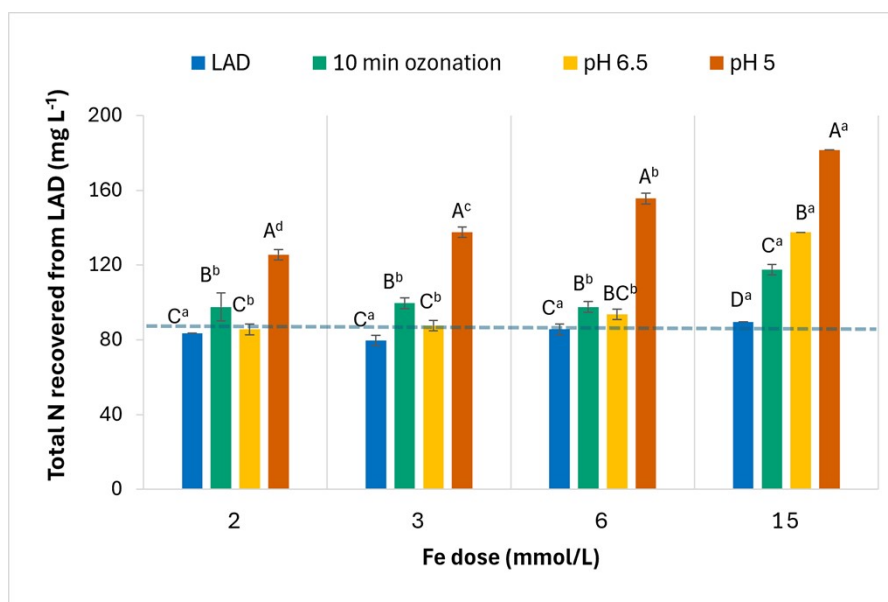

Figure S7. Estimated values for total N recovered from LAD after using either no pretreatment, 10 min of ozonation, acidification to pH 6.5, and acidification to pH 5.0. Pretreatments were applied before the addition of Fe and biochar. N removal was estimated by the differences in N concentration on recovered solids and the untreated biochar per volume of LAD. Dashed line indicates the N recovered when 6 g L<sup>-1</sup> of biochar was used with no Fe addition. Different uppercase letters indicate significant differences between treatments within the same Fe dose ( $p < 0.05$ ). Different superscript letters indicate significant differences between Fe doses within the same treatment ( $p < 0.05$ ).

Table S6. ANOVA effect sizes ( $\eta^2$ ) for iron dose, pretreatment, and their interaction across all response variables.

| Effect size from ANOVA   |          |
|--------------------------|----------|
| Total P in the effluent  |          |
| Parameter                | $\eta^2$ |
| Iron dose                | 0.97     |
| Pretreatment             | 0.84     |
| Iron dose : pretreatment | 0.85     |
| Total P on solids        |          |
| Parameter                | $\eta^2$ |
| Iron dose                | 0.91     |
| Pretreatment             | 0.63     |
| Iron dose : pretreatment | 0.55     |
| TSS                      |          |
| Parameter                | $\eta^2$ |
| Iron dose                | 0.98     |
| Pretreatment             | 0.97     |
| Iron dose : pretreatment | 0.98     |
| P availability           |          |
| Parameter                | $\eta^2$ |
| Iron dose                | 0.99     |
| Pretreatment             | 0.96     |
| Iron dose : pretreatment | 0.92     |
| Total N on solids        |          |
| Parameter                | $\eta^2$ |
| Iron dose                | 0.96     |
| Pretreatment             | 0.98     |
| Iron dose : pretreatment | 0.88     |

Table S7. pH values measured after FeCl<sub>3</sub> addition.

| Fe dose<br>(mmol L <sup>-1</sup> ) | Pretreatment                |                     |        |      |
|------------------------------------|-----------------------------|---------------------|--------|------|
|                                    | LAD with no<br>pretreatment | 10 min<br>ozonation | pH 6.5 | pH 5 |
|                                    | pH after Fe addition        |                     |        |      |
| 0                                  | 8.01                        | 8.01                | 6.5    | 5    |
| 2                                  | 8.01                        | 8.14                | 6.46   | 4.84 |
| 3                                  | 8.02                        | 8.09                | 6.36   | 4.67 |
| 6                                  | 8.01                        | 8.02                | 6.27   | 4.22 |
| 15                                 | 8.02                        | 8.02                | 6.05   | 2.65 |

# SEM images and EDS spectra of solids recovered from filtration

## LAD treated with BN biochar only

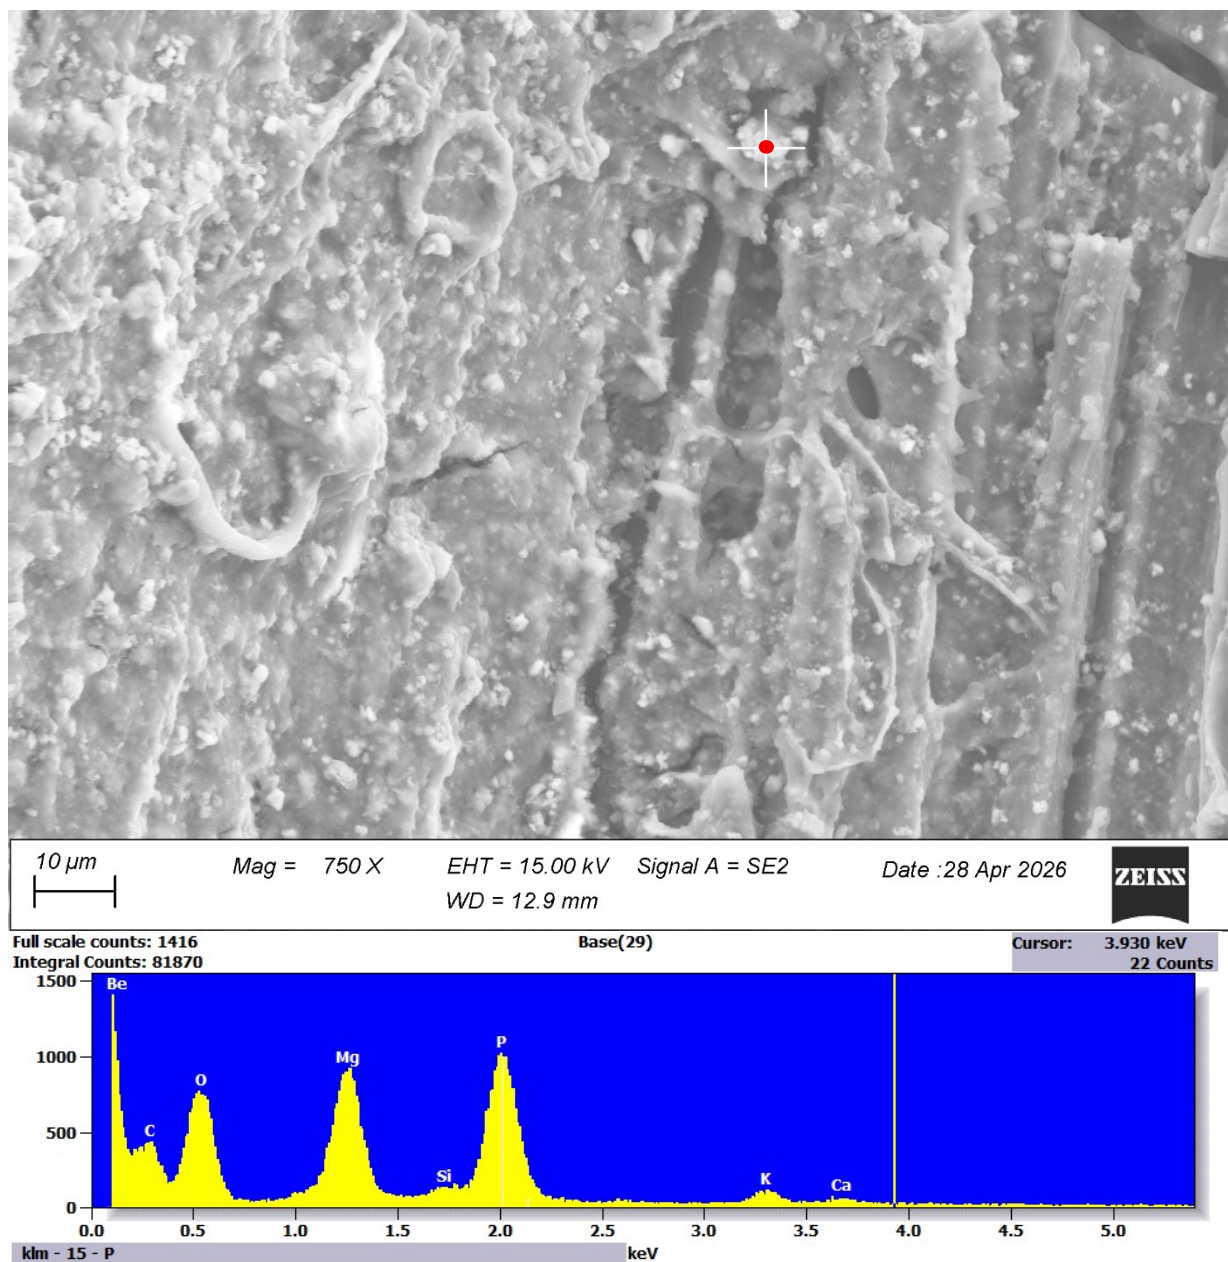

Figure S8. SEM image of solids retained during filtration of the 6 g L<sup>-1</sup> biochar treatment with no Fe addition. The biochar matrix forms the darker background, while high-contrast (bright) features represent LAD-associated solids deposited on or trapped within the biochar structure. The EDS spectrum collected at the red point indicates the presence of P in these LAD solids. The Be peak is an artifact due to spectral overlapping with C.

Table S8. Quantitative Results for: Base(29). The reported Be signal is an artifact of spectral overlapping with C.

| <i>Element Line</i> | <i>Net Counts</i> | <i>Int. Cps/nA</i> | <i>K-Ratio</i> | <i>ZAF</i> | <i>Weight %</i> | <i>Weight % Error</i> | <i>Atom %</i> | <i>Atom % Error</i> | <i>Formula</i> | <i>Compnd %</i> |
|---------------------|-------------------|--------------------|----------------|------------|-----------------|-----------------------|---------------|---------------------|----------------|-----------------|
| <i>Be K</i>         | 10937             | 113.927            | 0.82           | 2.271      | 84.92           | ± 1.63                | 92.24         | ± 3.54              | Be             | 84.92           |
| <i>C K</i>          | 19702             | 205.229            | 0.00           | 0.000      | ---             | ---                   | ---           | ---                 | (null)         | ---             |
| <i>O K</i>          | 15302             | 159.396            | 0.08           | 2.579      | 10.01           | ± 0.25                | 6.12          | ± 0.31              | O              | 10.01           |
| <i>Mg K</i>         | 13556             | 141.208            | 0.03           | 1.186      | 1.52            | ± 0.03                | 0.61          | ± 0.02              | Mg             | 1.52            |
| <i>Si K</i>         | 1128              | 11.750             | 0.00           | 1.103      | 0.14            | ± 0.04                | 0.05          | ± 0.03              | Si             | 0.14            |
| <i>Si L</i>         | 0                 | 0.000              | 0.00           | 0.000      | ---             | ---                   | ---           | ---                 | (null)         | ---             |
| <i>P K</i>          | 17674             | 184.104            | 0.05           | 1.128      | 2.66            | ± 0.05                | 0.84          | ± 0.03              | P              | 2.66            |
| <i>P L</i>          | 0                 | 0.000              | 0.00           | 0.000      | ---             | ---                   | ---           | ---                 | (null)         | ---             |
| <i>K K</i>          | 1422              | 14.813             | 0.01           | 1.161      | 0.33            | ± 0.02                | 0.08          | ± 0.01              | K              | 0.33            |
| <i>K L</i>          | 0                 | 0.000              | 0.00           | 0.000      | ---             | ---                   | ---           | ---                 | (null)         | ---             |
| <i>Ca K</i>         | 594               | 6.188              | 0.00           | 1.142      | 0.16            | ± 0.02                | 0.04          | ± 0.01              | Ca             | 0.16            |
| <i>Ca L</i>         | 0                 | 0.000              | 0.00           | 0.000      | ---             | ---                   | ---           | ---                 | (null)         | ---             |
| <i>Ta L</i>         | 86                | 0.896              | 0.00           | 1.833      | 0.27            | ± 0.19                | 0.01          | ± 0.02              | Ta             | 0.27            |
| <i>Ta M</i>         | 13                | 0.135              | 0.00           | 0.000      | ---             | ---                   | ---           | ---                 | (null)         | ---             |
| <b>Total</b>        |                   |                    |                |            | 100.00          |                       | 100.00        |                     |                | 100.00          |

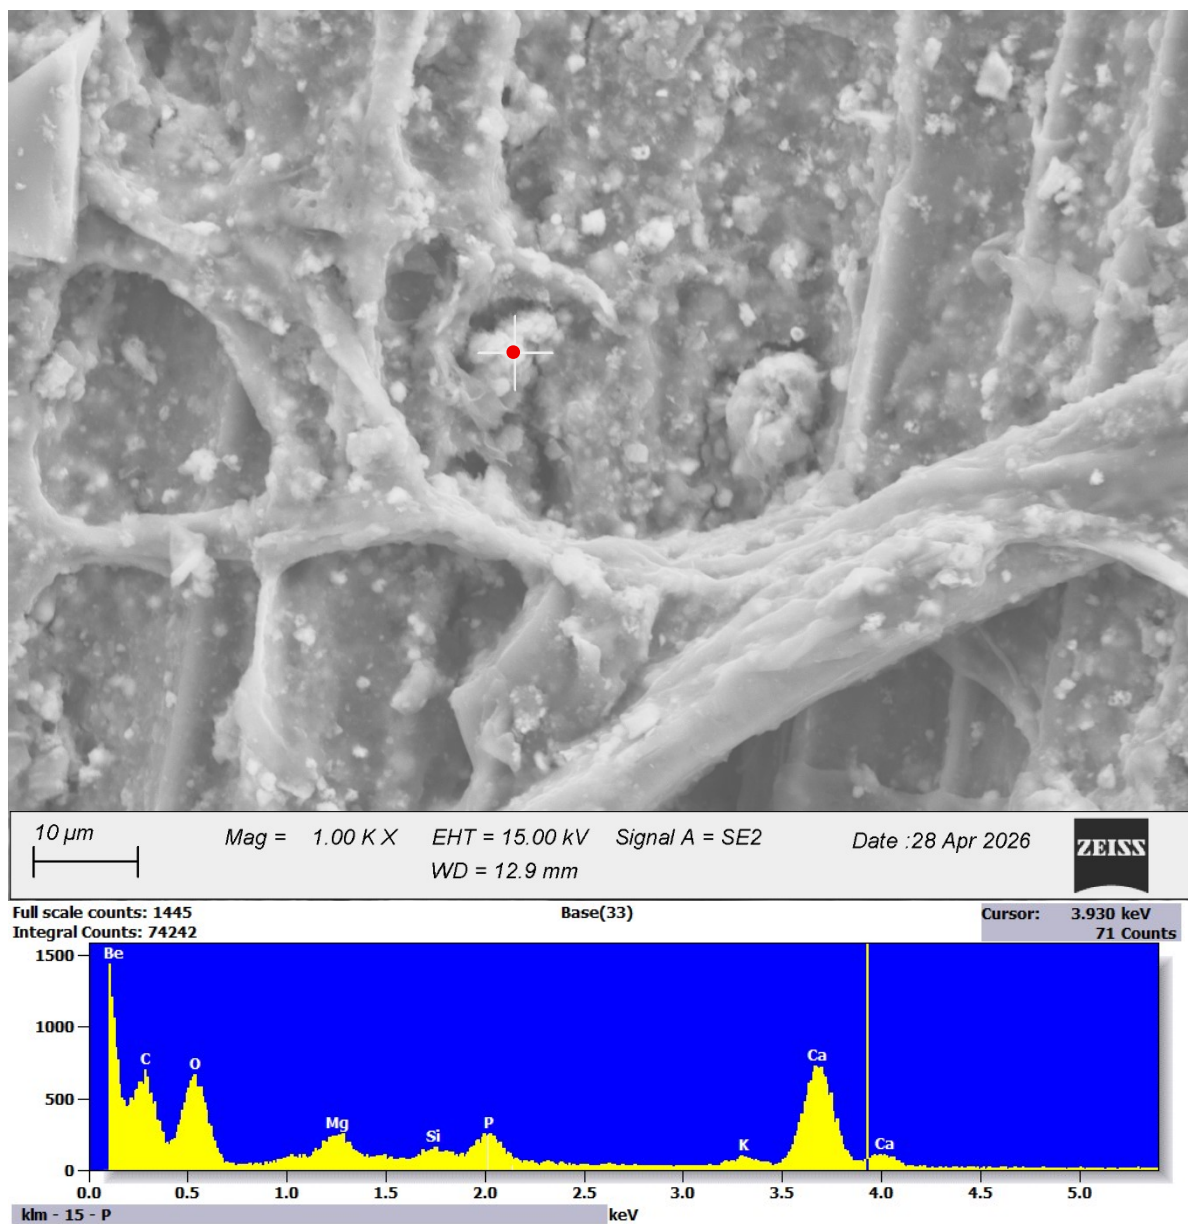

Figure S9. SEM image of solids retained during filtration of the 6 g L<sup>-1</sup> biochar treatment with no Fe addition. The biochar matrix forms the darker background, while high-contrast (bright) features represent LAD-associated solids deposited on or trapped within the biochar structure. The EDS spectrum collected at the red point indicates the presence of P in these LAD solids. The Be peak is an artifact due to spectral overlapping with C.

Table S9. Quantitative Results for: Base(33). The reported Be signal is an artifact of spectral overlapping with C.

| <i>Element</i> | <i>Net</i>    | <i>Int.</i>   | <i>K-</i>    |            | <i>Weight</i> | <i>Weight</i> | <i>Atom</i> | <i>Atom</i>  | <i>Formula</i> | <i>Compound</i> |
|----------------|---------------|---------------|--------------|------------|---------------|---------------|-------------|--------------|----------------|-----------------|
| <i>t</i>       |               |               | <i>Ratio</i> | <i>ZAF</i> | <i>%</i>      | <i>%</i>      | <i>%</i>    | <i>%</i>     | <i>a</i>       | <i>%</i>        |
| <i>Line</i>    | <i>Counts</i> | <i>Cps/nA</i> |              |            |               | <i>Error</i>  |             | <i>Error</i> |                |                 |
| <b>Be K</b>    | 11926         | 124.229       | 0.84         | 2.045      | 85.15         | ± 1.65        | 92.64       | ± 3.59       | Be             | 85.15           |
| <b>C K</b>     | 24710         | 257.396       | 0.00         | 0.000      | ---           | ---           | ---         | ---          | (null)         | ---             |
| <b>O K</b>     | 13265         | 138.177       | 0.07         | 2.884      | 9.89          | ± 0.28        | 6.06        | ± 0.34       | O              | 9.89            |
| <b>Mg K</b>    | 1916          | 19.958        | 0.00         | 1.219      | 0.23          | ± 0.02        | 0.09        | ± 0.02       | Mg             | 0.23            |
| <b>Si K</b>    | 1423          | 14.823        | 0.00         | 1.098      | 0.18          | ± 0.01        | 0.06        | ± 0.01       | Si             | 0.18            |
| <b>Si L</b>    | 0             | 0.000         | 0.00         | 0.000      | ---           | ---           | ---         | ---          | (null)         | ---             |
| <b>P K</b>     | 3373          | 35.135        | 0.01         | 1.118      | 0.51          | ± 0.02        | 0.16        | ± 0.01       | P              | 0.51            |
| <b>P L</b>     | 0             | 0.000         | 0.00         | 0.000      | ---           | ---           | ---         | ---          | (null)         | ---             |
| <b>K K</b>     | 1104          | 11.500        | 0.00         | 1.110      | 0.25          | ± 0.02        | 0.06        | ± 0.01       | K              | 0.25            |
| <b>K L</b>     | 0             | 0.000         | 0.00         | 0.000      | ---           | ---           | ---         | ---          | (null)         | ---             |
| <b>Ca K</b>    | 14161         | 147.510       | 0.07         | 1.131      | 3.80          | ± 0.09        | 0.93        | ± 0.04       | Ca             | 3.80            |
| <b>Ca L</b>    | 0             | 0.000         | 0.00         | 0.000      | ---           | ---           | ---         | ---          | (null)         | ---             |
| <b>Total</b>   |               |               |              |            | 100.00        |               | 100.00      |              |                | 100.00          |

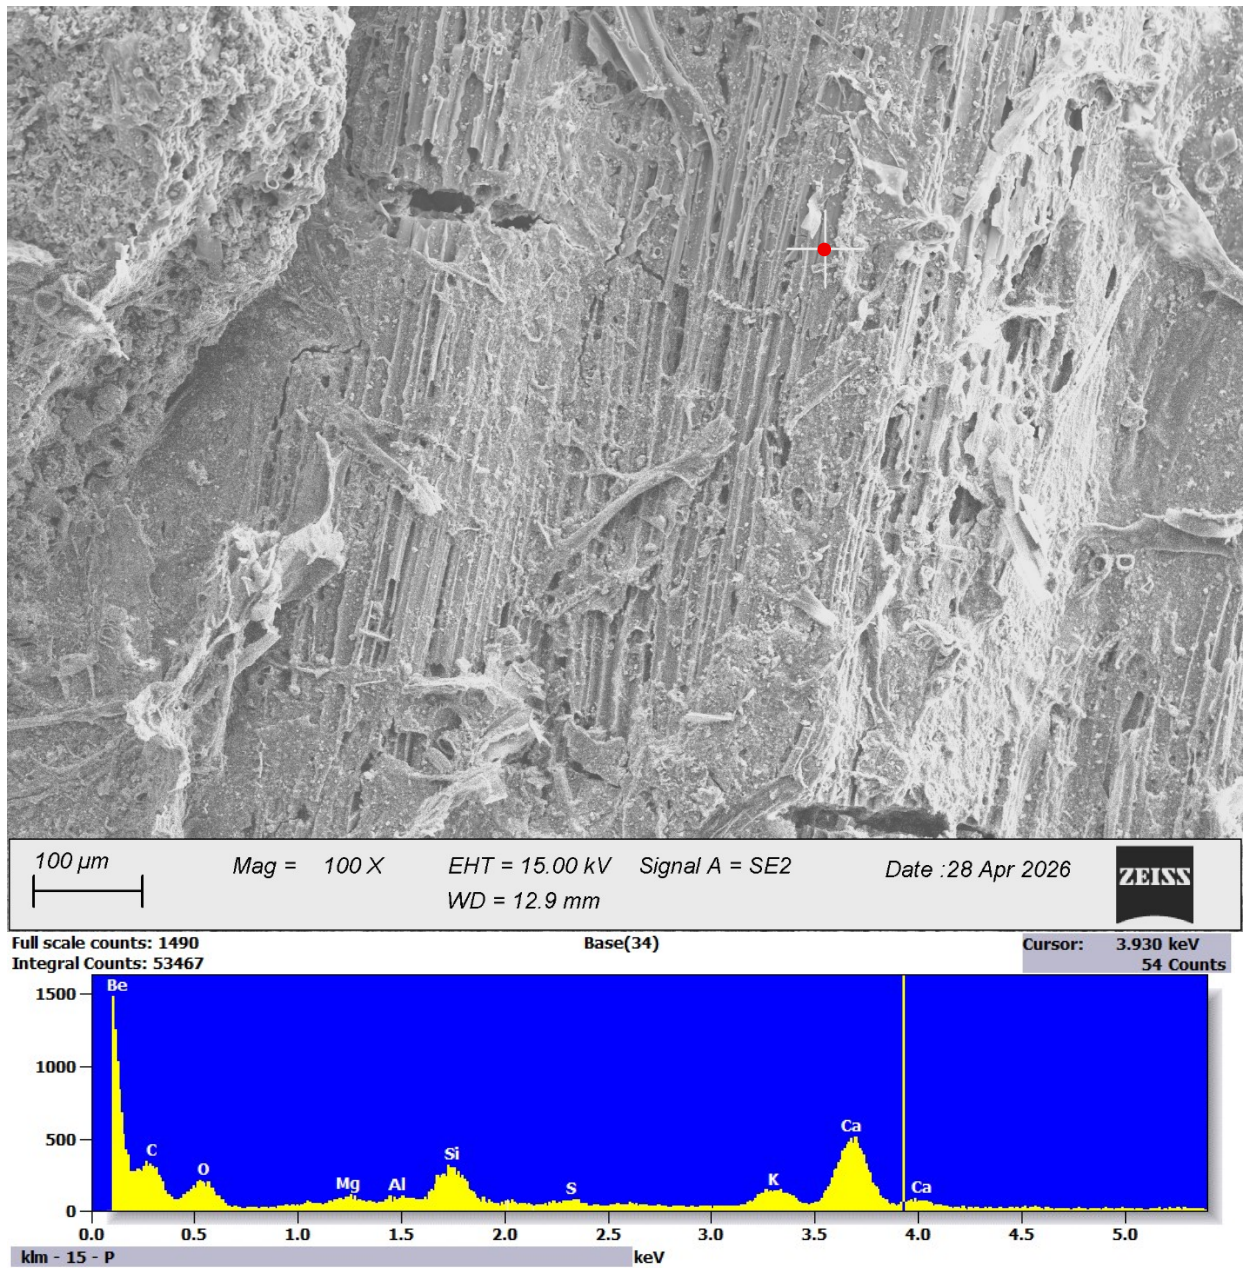

Figure S10. SEM image of solids retained during filtration of the 6 g L<sup>-1</sup> biochar treatment with no Fe addition. The biochar matrix forms the darker background, while high-contrast (bright) features represent LAD-associated solids deposited on or trapped within the biochar structure. The EDS spectrum collected at the red point shows no detectable P on the biochar matrix, in contrast to the LAD-derived particles. The Be peak is an artifact due to spectral overlapping with C.

Table S10. Quantitative Results for: Base(34). The reported Be signal is an artifact of spectral overlapping with C.

| <i>Element</i> | <i>Net</i>    | <i>Int.</i>   | <i>K-</i>    |            | <i>Weight</i> | <i>Weight</i> | <i>Atom</i> | <i>Atom</i>  | <i>Formul</i> | <i>Compnd</i> |
|----------------|---------------|---------------|--------------|------------|---------------|---------------|-------------|--------------|---------------|---------------|
| <i>t</i>       | <i>Counts</i> | <i>Cps/nA</i> | <i>Ratio</i> | <i>ZAF</i> | <i>%</i>      | <i>%</i>      | <i>%</i>    | <i>%</i>     | <i>a</i>      | <i>%</i>      |
| <i>Line</i>    |               |               |              |            |               | <i>Error</i>  |             | <i>Error</i> |               |               |
| <i>Be K</i>    | 11835         | 123.281       | 0.89         | 1.730      | 89.69         | ± 1.52        | 95.49       | ± 3.24       | Be            | 89.69         |
| <i>C K</i>     | 16462         | 171.479       | 0.00         | 0.000      | ---           | ---           | ---         | ---          | (null)        | ---           |
| <i>O K</i>     | 5576          | 58.083        | 0.03         | 2.971      | 5.37          | ± 0.23        | 3.22        | ± 0.28       | O             | 5.37          |
| <i>Mg K</i>    | 757           | 7.885         | 0.00         | 1.167      | 0.11          | ± 0.01        | 0.04        | ± 0.01       | Mg            | 0.11          |
| <i>Al K</i>    | 804           | 8.375         | 0.00         | 1.139      | 0.12          | ± 0.01        | 0.04        | ± 0.01       | Al            | 0.12          |
| <i>Si K</i>    | 4169          | 43.427        | 0.01         | 1.078      | 0.64          | ± 0.02        | 0.22        | ± 0.01       | Si            | 0.64          |
| <i>Si L</i>    | 0             | 0.000         | 0.00         | 0.000      | ---           | ---           | ---         | ---          | (null)        | ---           |
| <i>S K</i>     | 736           | 7.667         | 0.00         | 1.078      | 0.16          | ± 0.02        | 0.05        | ± 0.01       | S             | 0.16          |
| <i>SL</i>      | 0             | 0.000         | 0.00         | 0.000      | ---           | ---           | ---         | ---          | (null)        | ---           |
| <i>KK</i>      | 2616          | 27.250        | 0.01         | 1.113      | 0.74          | ± 0.06        | 0.18        | ± 0.03       | K             | 0.74          |
| <i>KL</i>      | 0             | 0.000         | 0.00         | 0.000      | ---           | ---           | ---         | ---          | (null)        | ---           |
| <i>Ca K</i>    | 9411          | 98.031        | 0.05         | 1.133      | 3.18          | ± 0.10        | 0.76        | ± 0.05       | Ca            | 3.18          |
| <i>Ca L</i>    | 0             | 0.000         | 0.00         | 0.000      | ---           | ---           | ---         | ---          | (null)        | ---           |
| <i>Total</i>   |               |               |              |            | 100.00        |               | 100.00      |              |               | 100.00        |

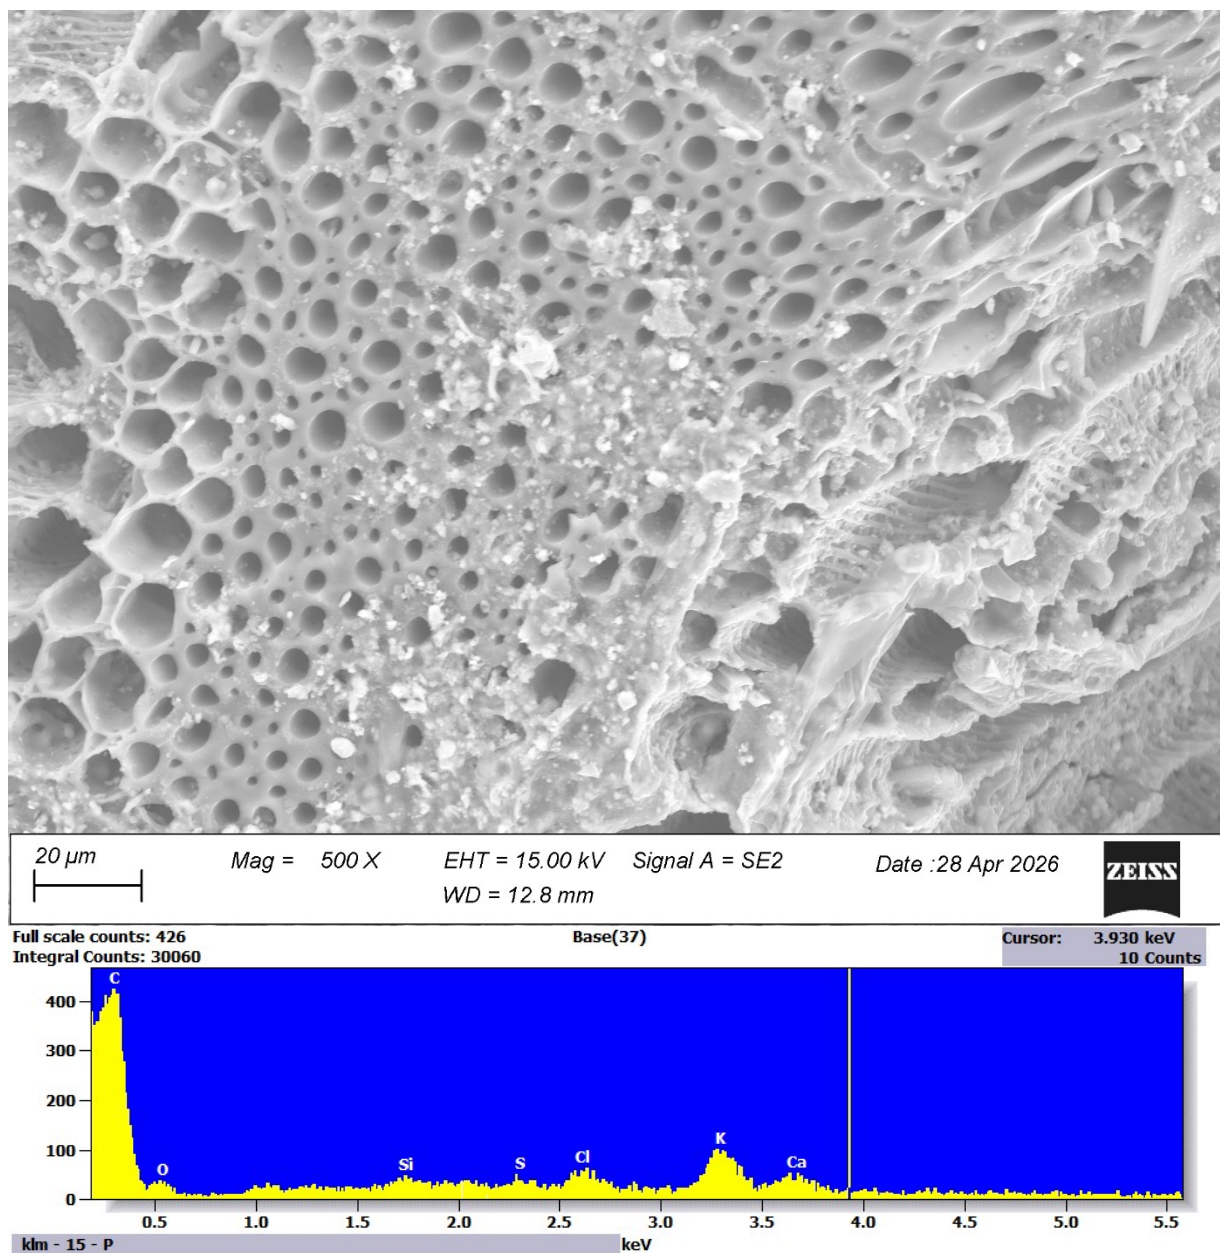

Figure S11. SEM image of solids retained during filtration of the 6 g L<sup>-1</sup> biochar treatment with no Fe addition. The biochar matrix forms the darker background, while high-contrast (bright) features represent LAD-associated solids deposited on or trapped within the biochar structure. The EDS spectrum represents an area scan collected from the entire square region, encompassing both the biochar matrix and the associated solids.

Table S11. Quantitative Results for: Base(37). The reported Be signal is an artifact of spectral overlapping with C.

| <i>Element Line</i> | <i>Net Counts</i> | <i>Int. Cps/nA</i> | <i>K-Ratio</i> | <i>ZAF</i> | <i>Weight %</i> | <i>Weight % Error</i> | <i>Atom %</i> | <i>Atom % Error</i> | <i>Formula</i> | <i>Compnd %</i> |
|---------------------|-------------------|--------------------|----------------|------------|-----------------|-----------------------|---------------|---------------------|----------------|-----------------|
| <i>Be K</i>         | 3017              | 31.427             | 0.93           | 1.334      | 92.86           | ±15.36                | 97.40         | ±32.22              | Be             | 92.86           |
| <i>C K</i>          | 10126             | 105.479            | 0.00           | 0.000      | ---             | ---                   | ---           | ---                 | (null)         | ---             |
| <i>O K</i>          | 460               | 4.792              | 0.01           | 3.011      | 2.36            | ± 0.34                | 1.39          | ± 0.40              | O              | 2.36            |
| <i>Si K</i>         | 305               | 3.177              | 0.00           | 1.059      | 0.24            | ± 0.04                | 0.08          | ± 0.03              | Si             | 0.24            |
| <i>Si L</i>         | 0                 | 0.000              | 0.00           | 0.000      | ---             | ---                   | ---           | ---                 | (null)         | ---             |
| <i>S K</i>          | 289               | 3.010              | 0.00           | 1.060      | 0.32            | ± 0.07                | 0.09          | ± 0.04              | S              | 0.32            |
| <i>S L</i>          | 0                 | 0.000              | 0.00           | 0.000      | ---             | ---                   | ---           | ---                 | (null)         | ---             |
| <i>Cl K</i>         | 674               | 7.021              | 0.01           | 1.116      | 0.84            | ± 0.08                | 0.22          | ± 0.04              | Cl             | 0.84            |
| <i>Cl L</i>         | 0                 | 0.000              | 0.00           | 0.000      | ---             | ---                   | ---           | ---                 | (null)         | ---             |
| <i>K K</i>          | 1662              | 17.313             | 0.03           | 1.141      | 2.51            | ± 0.23                | 0.61          | ± 0.11              | K              | 2.51            |
| <i>K L</i>          | 0                 | 0.000              | 0.00           | 0.000      | ---             | ---                   | ---           | ---                 | (null)         | ---             |
| <i>Ca K</i>         | 493               | 5.135              | 0.01           | 1.144      | 0.88            | ± 0.11                | 0.21          | ± 0.05              | Ca             | 0.88            |
| <i>Ca L</i>         | 0                 | 0.000              | 0.00           | 0.000      | ---             | ---                   | ---           | ---                 | (null)         | ---             |
| <b>Total</b>        |                   |                    |                |            | 100.00          |                       | 100.00        |                     |                | 100.00          |

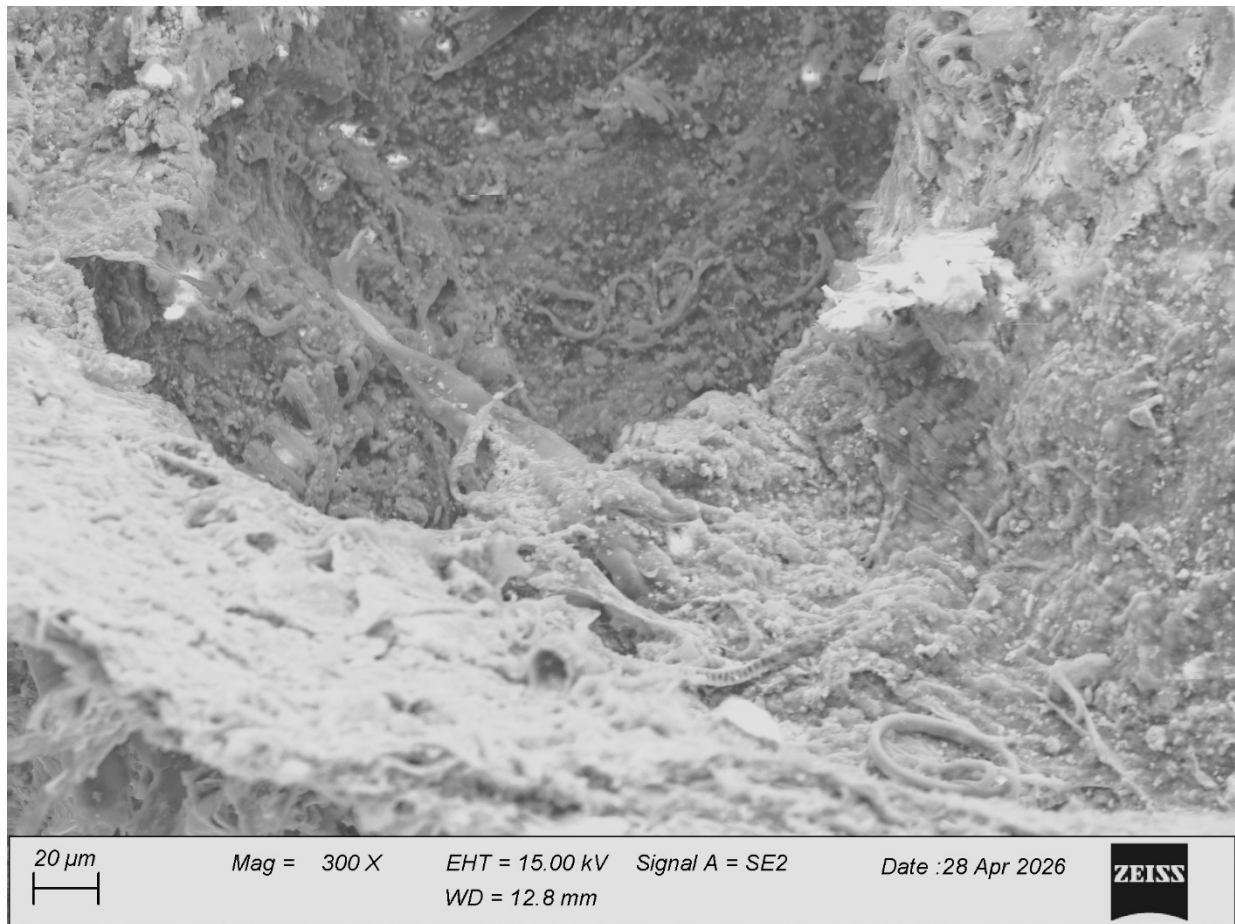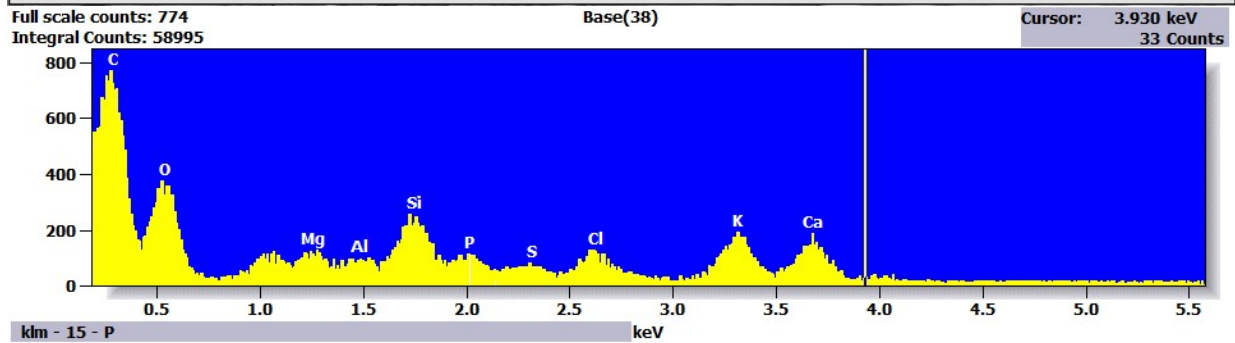

Figure S12. SEM image of solids retained during filtration of the 6 g L<sup>-1</sup> biochar treatment with no Fe addition. The image shows the irregular features that represent LAD-associated solids deposited on or trapped within the biochar structure. The EDS spectrum represents an area scan collected from the entire square region and indicates the presence of P, which is associated with the LAD solids.

Table S12. Quantitative Results for: Base(38). The reported Be signal is an artifact of spectral overlapping with C.

| <i>Element</i> | <i>Net</i>    | <i>Int.</i>   | <i>K-</i>    |            | <i>Weight</i> | <i>Weight</i> | <i>Atom</i> | <i>Atom</i>  | <i>Formul</i> | <i>Compnd</i> |
|----------------|---------------|---------------|--------------|------------|---------------|---------------|-------------|--------------|---------------|---------------|
| <i>t</i>       | <i>Counts</i> | <i>Cps/nA</i> | <i>Ratio</i> | <i>ZAF</i> | <i>%</i>      | <i>%</i>      | <i>%</i>    | <i>%</i>     | <i>a</i>      | <i>%</i>      |
| <i>Line</i>    |               |               |              |            |               | <i>Error</i>  |             | <i>Error</i> |               |               |
| <i>Be K</i>    | 0             | 0.000         | 0.00         | 5.734      | 0.00          | ---           | 0.00        | ± 0.00       | Be            | 0.00          |
| <i>C K</i>     | 10605         | 110.469       | 0.00         | 0.000      | ---           | ---           | ---         | ---          | (null)        | ---           |
| <i>O K</i>     | 1305          | 13.594        | 0.13         | 5.159      | 39.10         | ± 8.87        | 57.89       | ±26.26       | O             | 39.10         |
| <i>Mg K</i>    | 742           | 7.729         | 0.03         | 1.674      | 2.69          | ± 0.33        | 2.62        | ± 0.65       | Mg            | 2.69          |
| <i>Al K</i>    | 540           | 5.625         | 0.02         | 1.461      | 1.88          | ± 0.32        | 1.65        | ± 0.57       | Al            | 1.88          |
| <i>Si K</i>    | 3127          | 32.573        | 0.14         | 1.265      | 10.04         | ± 0.37        | 8.46        | ± 0.62       | Si            | 10.04         |
| <i>Si L</i>    | 0             | 0.000         | 0.00         | 0.000      | ---           | ---           | ---         | ---          | (null)        | ---           |
| <i>P K</i>     | 1046          | 10.896        | 0.06         | 1.302      | 4.16          | ± 0.39        | 3.18        | ± 0.60       | P             | 4.16          |
| <i>PL</i>      | 0             | 0.000         | 0.00         | 0.000      | ---           | ---           | ---         | ---          | (null)        | ---           |
| <i>SK</i>      | 771           | 8.031         | 0.05         | 1.204      | 3.28          | ± 0.38        | 2.42        | ± 0.57       | S             | 3.28          |
| <i>SL</i>      | 0             | 0.000         | 0.00         | 0.000      | ---           | ---           | ---         | ---          | (null)        | ---           |
| <i>Cl K</i>    | 1644          | 17.125        | 0.11         | 1.210      | 7.57          | ± 0.44        | 5.06        | ± 0.58       | Cl            | 7.57          |
| <i>Cl L</i>    | 0             | 0.000         | 0.00         | 0.000      | ---           | ---           | ---         | ---          | (null)        | ---           |
| <i>KK</i>      | 3026          | 31.521        | 0.24         | 1.154      | 15.77         | ± 1.06        | 9.55        | ± 1.29       | K             | 15.77         |
| <i>KL</i>      | 0             | 0.000         | 0.00         | 0.000      | ---           | ---           | ---         | ---          | (null)        | ---           |
| <i>Ca K</i>    | 2467          | 25.698        | 0.23         | 1.182      | 15.53         | ± 0.65        | 9.17        | ± 0.77       | Ca            | 15.53         |
| <i>Ca L</i>    | 0             | 0.000         | 0.00         | 0.000      | ---           | ---           | ---         | ---          | (null)        | ---           |
| <b>Total</b>   |               |               |              |            | 100.00        |               | 100.00      |              |               | 100.00        |

**LAD treated with biochar + 15 mmol L<sup>-1</sup> Fe**

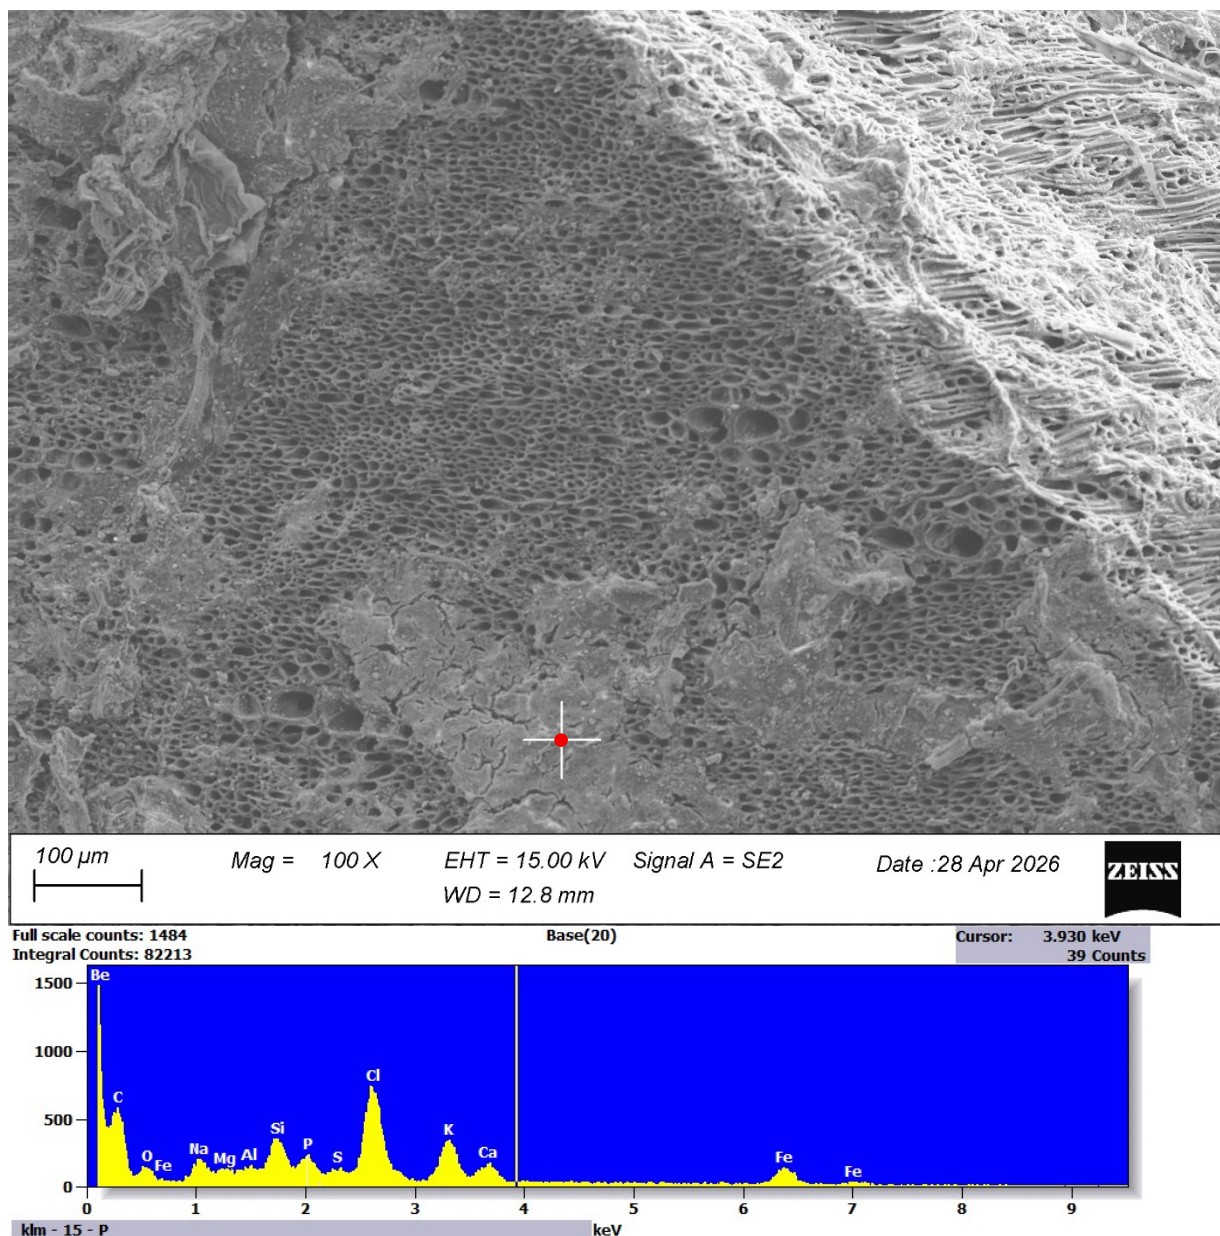

Figure S13. SEM image of solids retained during filtration of the  $6 \text{ g L}^{-1}$  biochar with  $15 \text{ mmol L}^{-1}$  Fe treatment. The biochar matrix forms a porous carbon framework in the background, while the irregular deposits represent LAD-associated solids attached to or trapped within the biochar structure. The EDS spectrum collected at the red point indicates the presence of Fe and P in these LAD solids. The Be peak is an artifact due to spectral overlapping with C.

Table S13. Quantitative Results for: Base(20). The reported Be signal is an artifact of spectral overlapping with C.

| <i>Element</i> | <i>Net</i>    | <i>Int.</i>   | <i>K-</i>    |            | <i>Weight</i> | <i>Weight</i> | <i>Atom</i> | <i>Atom</i>  | <i>Formul</i> | <i>Compnd</i> |
|----------------|---------------|---------------|--------------|------------|---------------|---------------|-------------|--------------|---------------|---------------|
| <i>t</i>       | <i>Counts</i> | <i>Cps/nA</i> | <i>Ratio</i> | <i>ZAF</i> | <i>%</i>      | <i>%</i>      | <i>%</i>    | <i>%</i>     | <i>a</i>      | <i>%</i>      |
| <i>Line</i>    |               |               |              |            |               | <i>Error</i>  |             | <i>Error</i> |               |               |
| <i>Be K</i>    | 3917          | 40.802        | 0.65         | 2.400      | 77.64         | ± 6.50        | 92.51       | ±15.49       | Be            | 77.64         |
| <i>C K</i>     | 9090          | 94.688        | 0.00         | 0.000      | ---           | ---           | ---         | ---          | (null)        | ---           |
| <i>O K</i>     | 1295          | 13.490        | 0.02         | 3.377      | 2.67          | ± 0.23        | 1.79        | ± 0.31       | O             | 2.67          |
| <i>Na K</i>    | 2236          | 23.292        | 0.01         | 1.528      | 1.13          | ± 0.05        | 0.53        | ± 0.05       | Na            | 1.13          |
| <i>Mg K</i>    | 832           | 8.667         | 0.00         | 1.295      | 0.25          | ± 0.03        | 0.11        | ± 0.03       | Mg            | 0.25          |
| <i>Al K</i>    | 934           | 9.729         | 0.00         | 1.212      | 0.28          | ± 0.03        | 0.11        | ± 0.03       | Al            | 0.28          |
| <i>Si K</i>    | 4398          | 45.813        | 0.02         | 1.114      | 1.31          | ± 0.04        | 0.50        | ± 0.03       | Si            | 1.31          |
| <i>Si L</i>    | 0             | 0.000         | 0.00         | 0.000      | ---           | ---           | ---         | ---          | (null)        | ---           |
| <i>P K</i>     | 2341          | 24.385        | 0.02         | 1.130      | 0.85          | ± 0.05        | 0.29        | ± 0.03       | P             | 0.85          |
| <i>PL</i>      | 0             | 0.000         | 0.00         | 0.000      | ---           | ---           | ---         | ---          | (null)        | ---           |
| <i>S K</i>     | 1023          | 10.656        | 0.01         | 1.082      | 0.41          | ± 0.05        | 0.14        | ± 0.03       | S             | 0.41          |
| <i>SL</i>      | 0             | 0.000         | 0.00         | 0.000      | ---           | ---           | ---         | ---          | (null)        | ---           |
| <i>Cl K</i>    | 13382         | 139.396       | 0.11         | 1.130      | 6.06          | ± 0.14        | 1.83        | ± 0.09       | Cl            | 6.06          |
| <i>CLL</i>     | 0             | 0.000         | 0.00         | 0.000      | ---           | ---           | ---         | ---          | (null)        | ---           |
| <i>KK</i>      | 6172          | 64.292        | 0.06         | 1.155      | 3.39          | ± 0.14        | 0.93        | ± 0.08       | K             | 3.39          |
| <i>KL</i>      | 0             | 0.000         | 0.00         | 0.000      | ---           | ---           | ---         | ---          | (null)        | ---           |
| <i>Ca K</i>    | 2013          | 20.969        | 0.02         | 1.143      | 1.29          | ± 0.07        | 0.35        | ± 0.04       | Ca            | 1.29          |
| <i>Ca L</i>    | 0             | 0.000         | 0.00         | 0.000      | ---           | ---           | ---         | ---          | (null)        | ---           |
| <i>Fe K</i>    | 2661          | 27.719        | 0.07         | 1.272      | 4.72          | ± 0.20        | 0.91        | ± 0.08       | Fe            | 4.72          |
| <i>Fe L</i>    | 74            | 0.771         | 0.00         | 0.000      | ---           | ---           | ---         | ---          | (null)        | ---           |
| <b>Total</b>   |               |               |              |            | 100.00        |               | 100.00      |              |               | 100.00        |

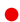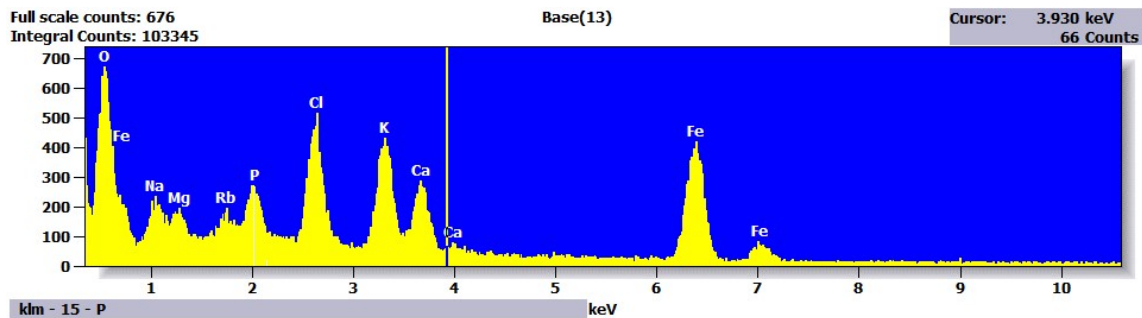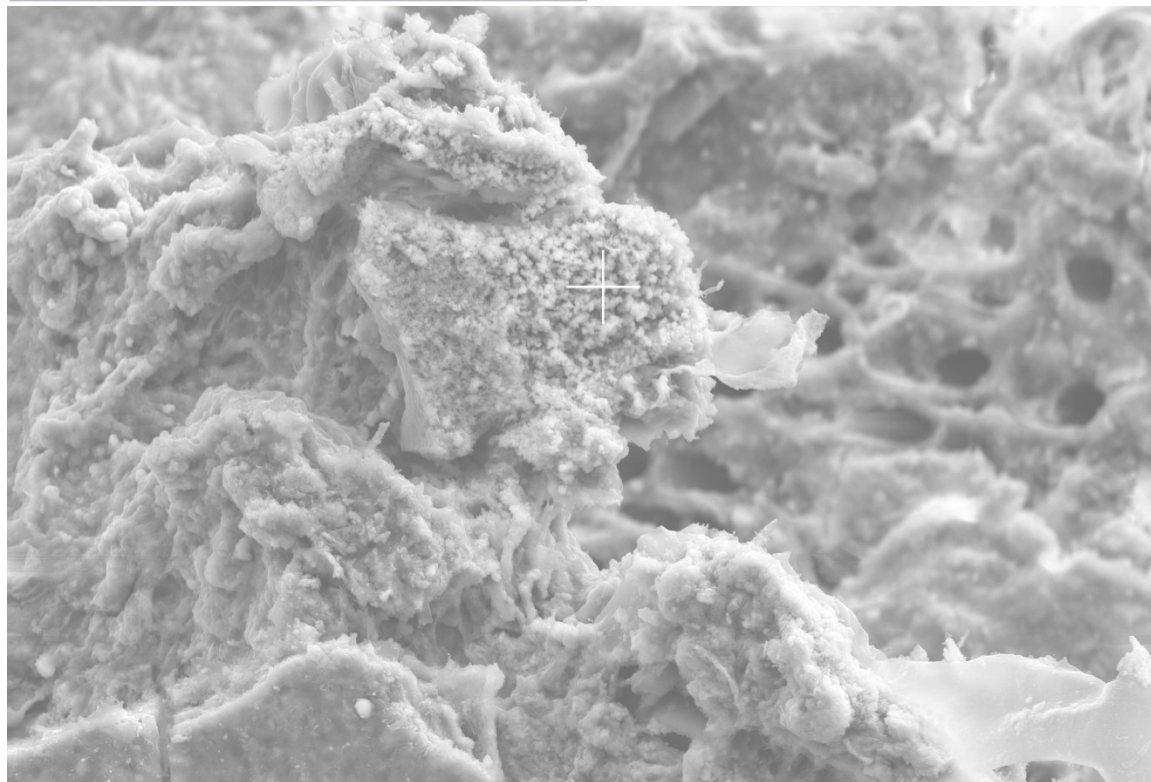

10  $\mu$ m

Mag = 700 X

EHT = 15.00 kV Signal A = SE2

Date : 28 Apr 2026

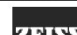



|              |        |        |        |
|--------------|--------|--------|--------|
| <b>Total</b> | 100.00 | 100.00 | 100.00 |
|--------------|--------|--------|--------|

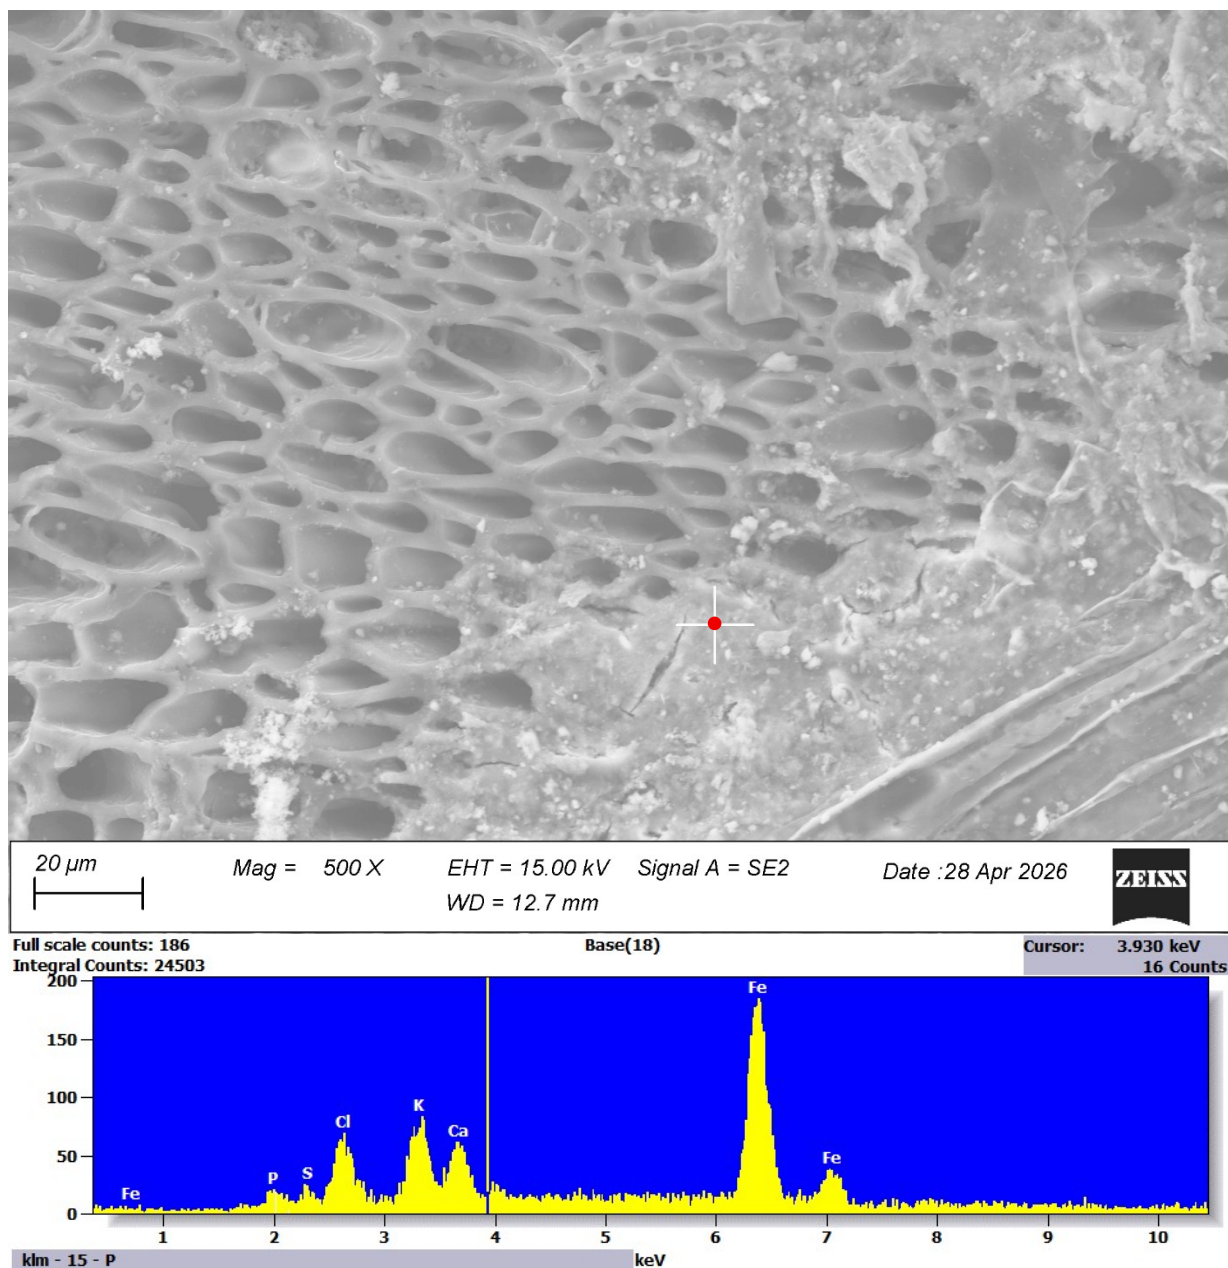

Figure S15. SEM image of solids retained during filtration of the 6 g L<sup>-1</sup> biochar with 15 mmol L<sup>-1</sup> Fe treatment. The biochar matrix forms a porous carbon framework in the background, while the irregular deposits represent LAD-associated solids attached to or trapped within the biochar structure. The EDS spectrum collected at the red point indicates the presence of Fe and P in these LAD solids.

| <i>Element</i> | <i>Net</i>    | <i>Int.</i>   | <i>K-</i>    |            | <i>Weight</i> | <i>Weight</i> | <i>Atom</i> | <i>Atom</i>  | <i>Formul</i> | <i>Compnd</i> |
|----------------|---------------|---------------|--------------|------------|---------------|---------------|-------------|--------------|---------------|---------------|
| <i>t</i>       | <i>Counts</i> | <i>Cps/nA</i> | <i>Ratio</i> | <i>ZAF</i> | <i>%</i>      | <i>%</i>      | <i>%</i>    | <i>%</i>     | <i>a</i>      | <i>%</i>      |
| <i>Line</i>    |               |               |              |            |               | <i>Error</i>  |             | <i>Error</i> |               |               |
| <i>Be K</i>    | 2427          | 25.281        | 0.73         | 2.160      | 82.73         | ± 7.77        | 96.39       | ±18.11       | Be            | 82.73         |
| <i>P K</i>     | 225           | 2.344         | 0.00         | 1.147      | 0.16          | ± 0.02        | 0.05        | ± 0.02       | P             | 0.16          |
| <i>P L</i>     | 0             | 0.000         | 0.00         | 0.000      | ---           | ---           | ---         | ---          | (null)        | ---           |
| <i>S K</i>     | 234           | 2.438         | 0.00         | 1.090      | 0.18          | ± 0.03        | 0.06        | ± 0.02       | S             | 0.18          |
| <i>S L</i>     | 0             | 0.000         | 0.00         | 0.000      | ---           | ---           | ---         | ---          | (null)        | ---           |
| <i>Cl K</i>    | 1210          | 12.604        | 0.02         | 1.125      | 1.04          | ± 0.09        | 0.31        | ± 0.05       | Cl            | 1.04          |
| <i>Cl L</i>    | 2159          | 22.490        | 0.00         | 0.000      | ---           | ---           | ---         | ---          | (null)        | ---           |
| <i>K K</i>     | 1433          | 14.927        | 0.02         | 1.114      | 1.44          | ± 0.13        | 0.39        | ± 0.07       | K             | 1.44          |
| <i>K L</i>     | 0             | 0.000         | 0.00         | 0.000      | ---           | ---           | ---         | ---          | (null)        | ---           |
| <i>Ca K</i>    | 963           | 10.031        | 0.02         | 1.096      | 1.12          | ± 0.16        | 0.29        | ± 0.08       | Ca            | 1.12          |
| <i>Ca L</i>    | 0             | 0.000         | 0.00         | 0.000      | ---           | ---           | ---         | ---          | (null)        | ---           |
| <i>Fe K</i>    | 3996          | 41.625        | 0.20         | 1.259      | 13.34         | ± 0.58        | 2.51        | ± 0.22       | Fe            | 13.34         |
| <i>Fe L</i>    | 0             | 0.000         | 0.00         | 0.000      | ---           | ---           | ---         | ---          | (null)        | ---           |
| <b>Total</b>   |               |               |              |            | 100.00        |               | 100.00      |              |               | 100.00        |

Table 15. Quantitative Results for: Base(18). The reported Be signal is an artifact of spectral overlapping with C.
